# Supplementary material
Source: PubMed Central journal article supplement (PMC6737939)

Figure S1

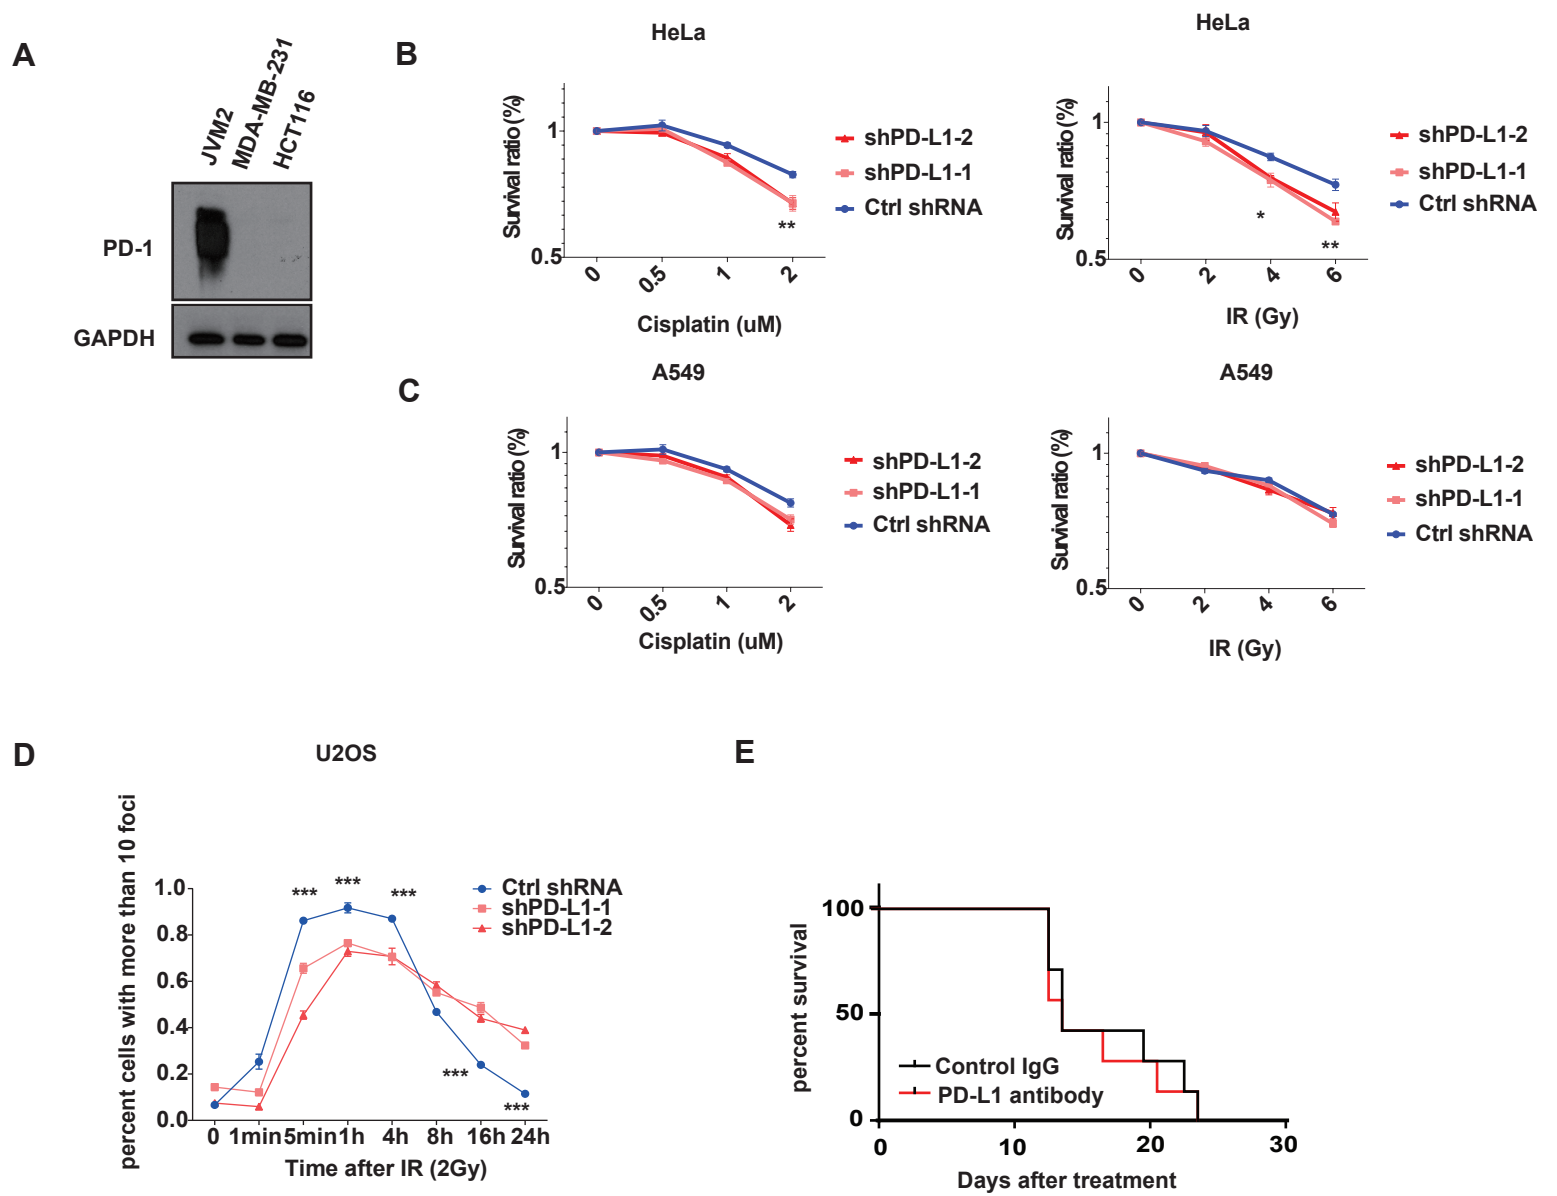

Figure S2

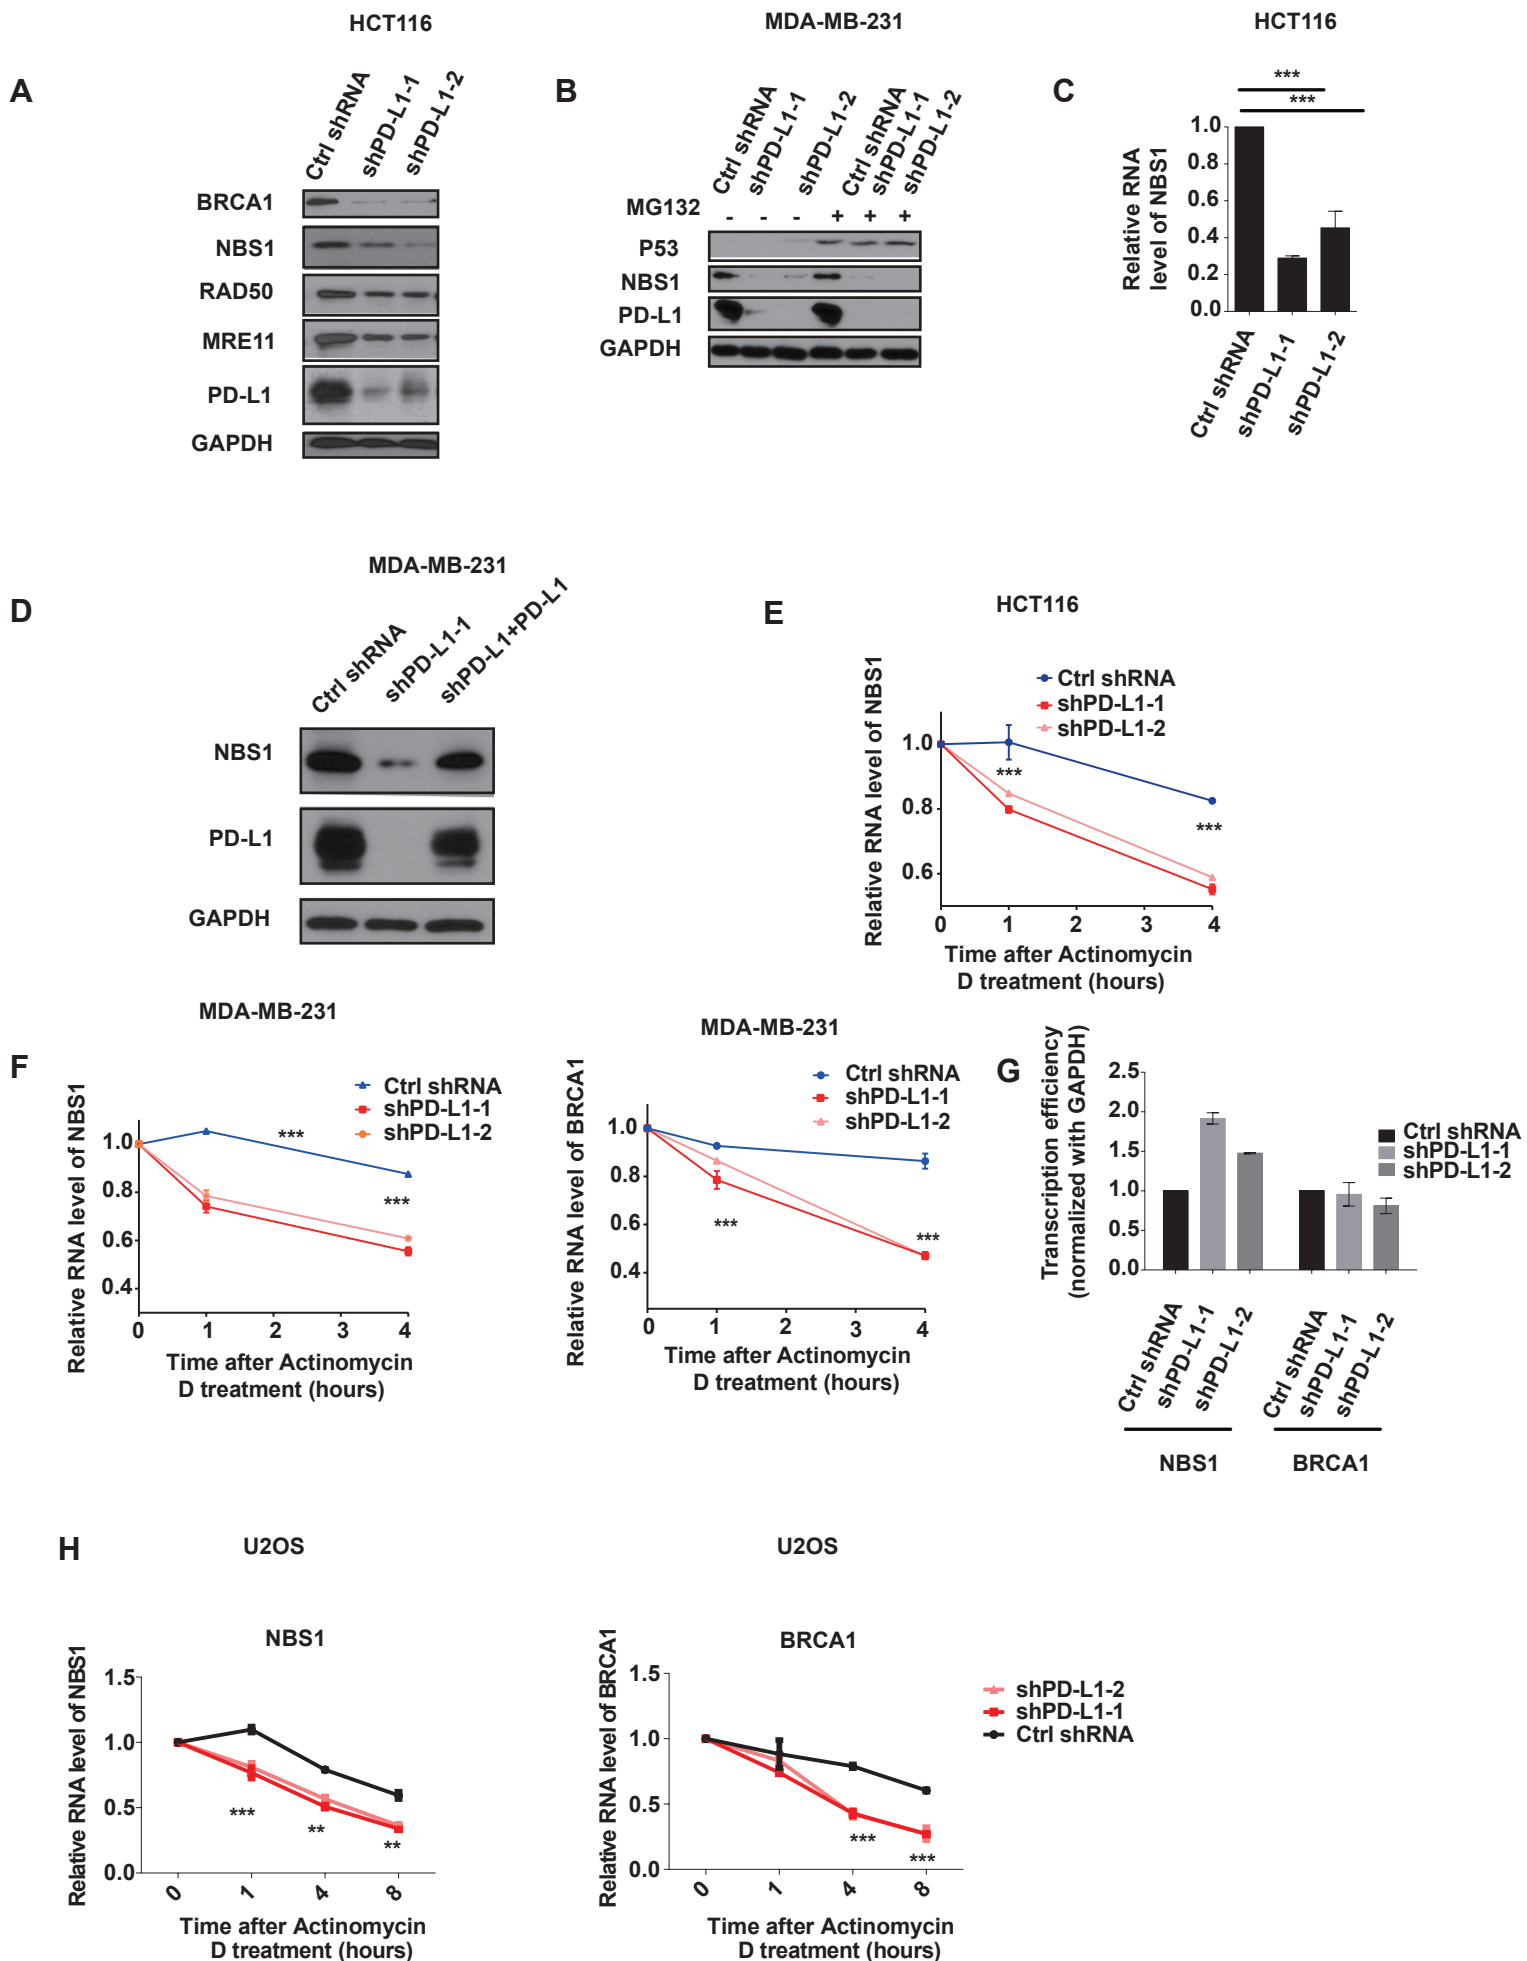

Figure S3

Isotype control

PD-L1 staining

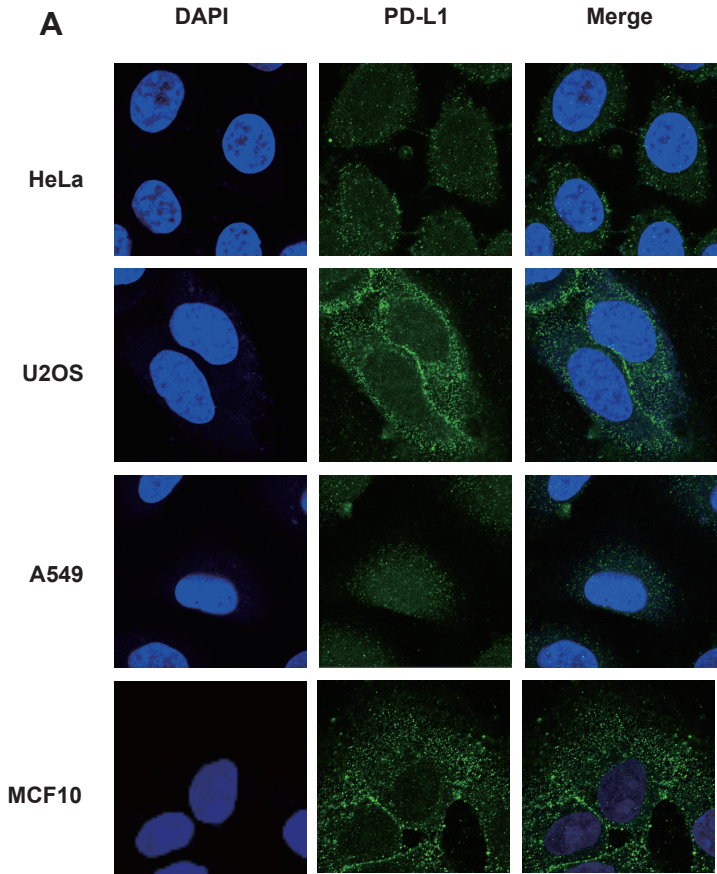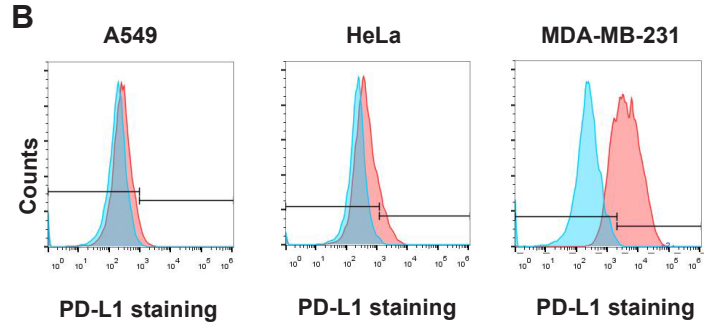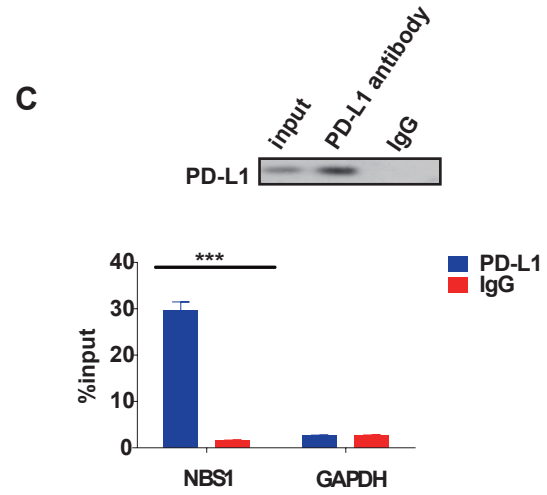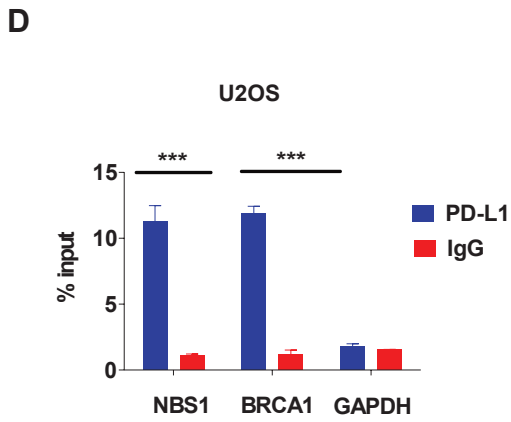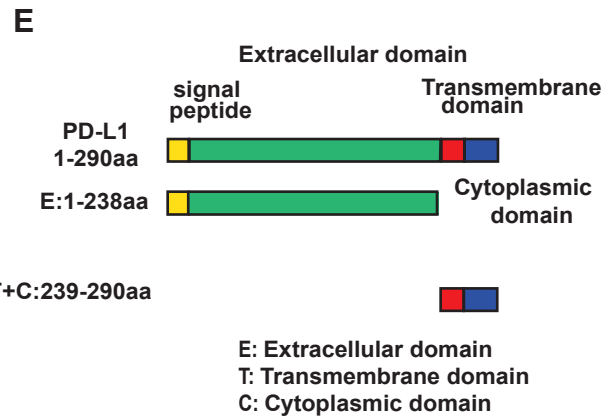

**F** RNA pull down (3'UTR of NBS1 mRNA)

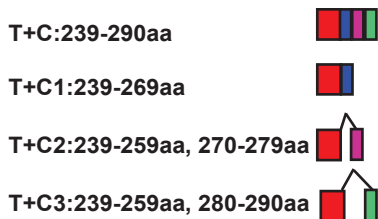

**G**

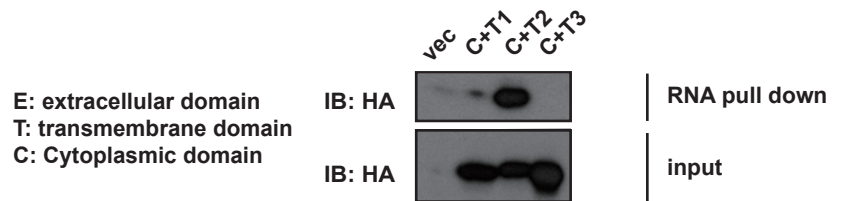

Figure S4

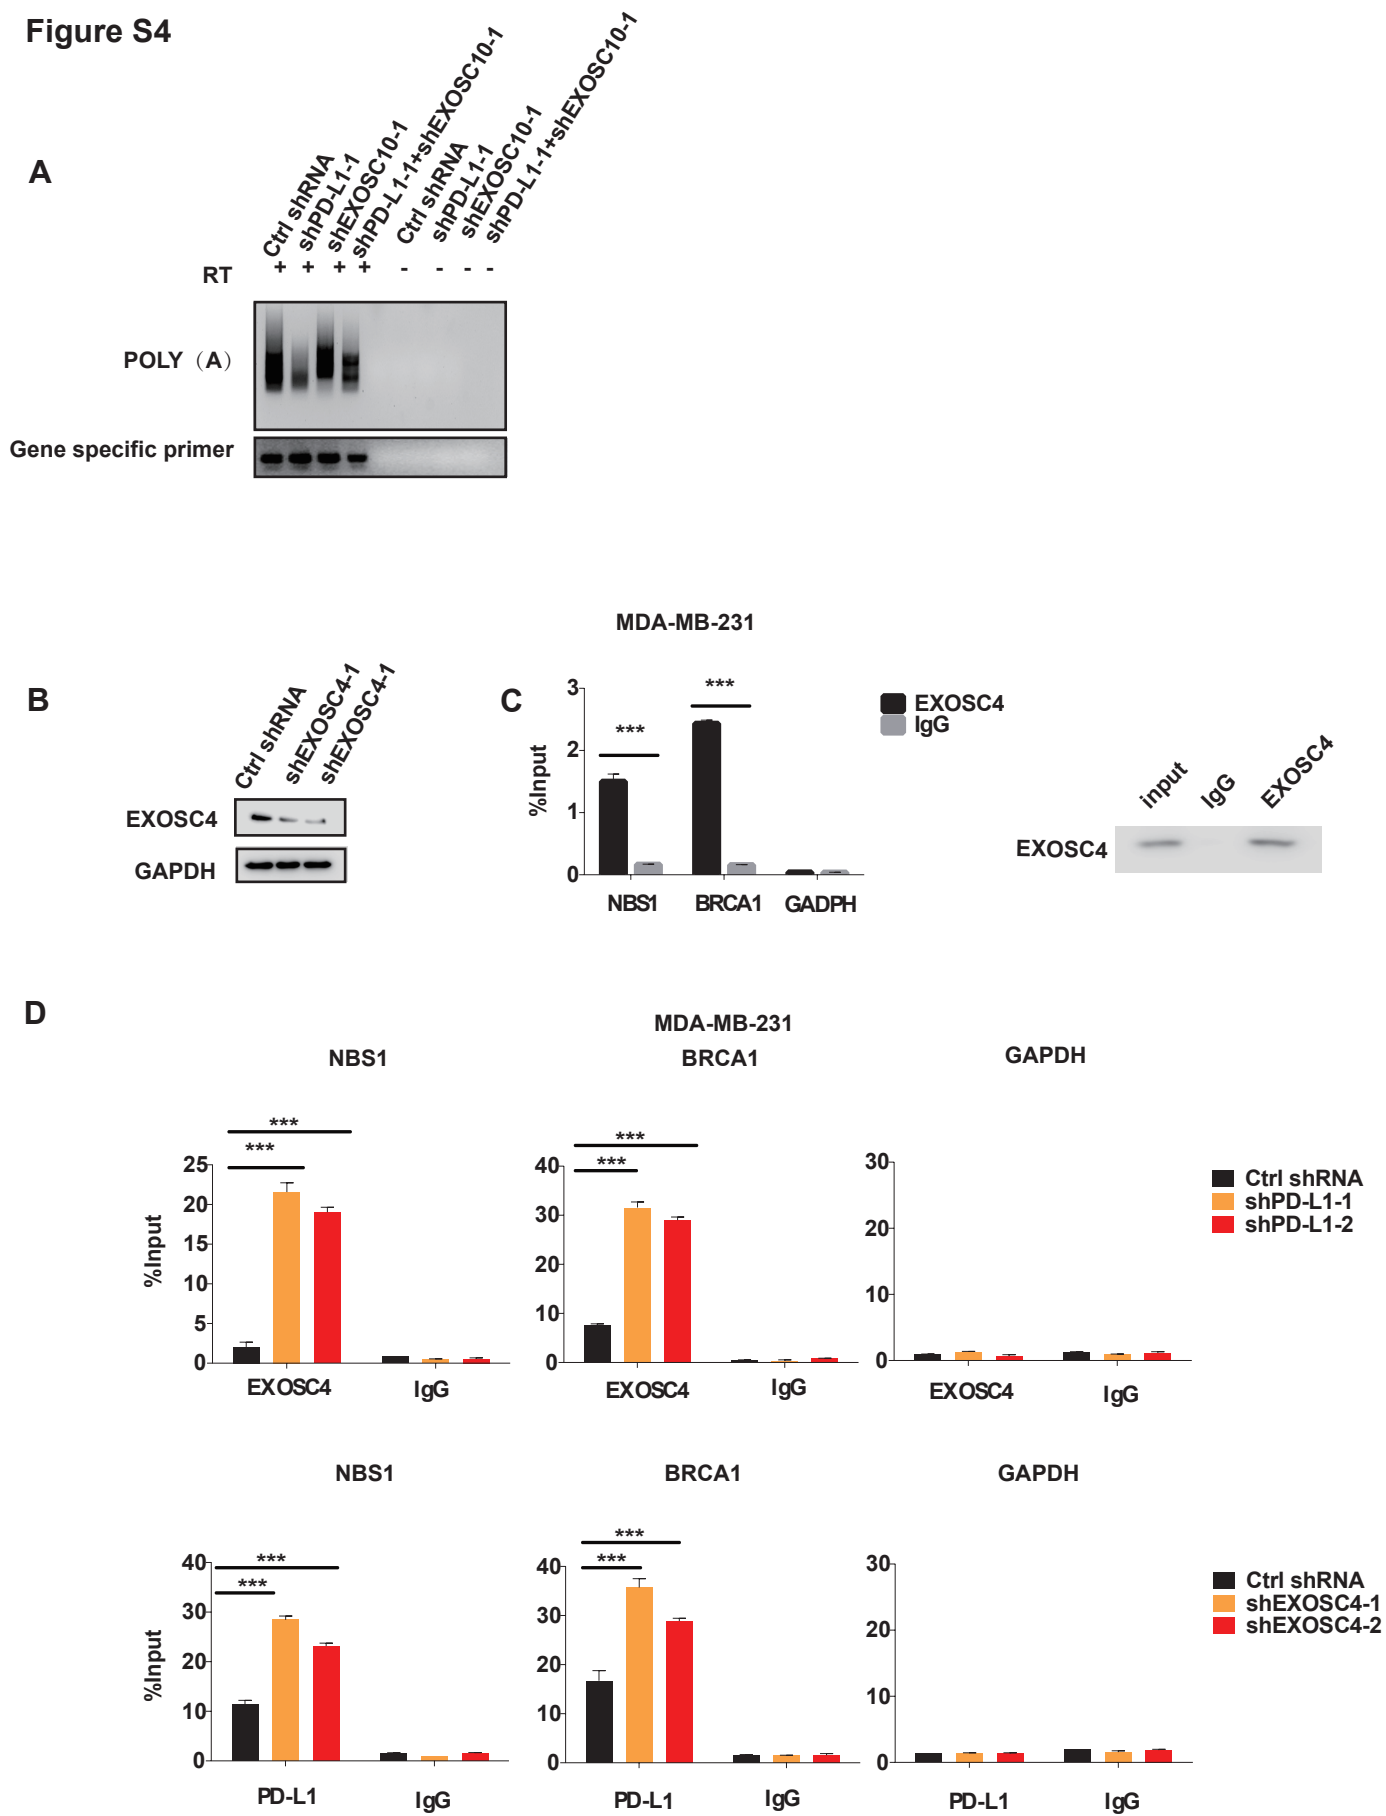



**Figure S5**

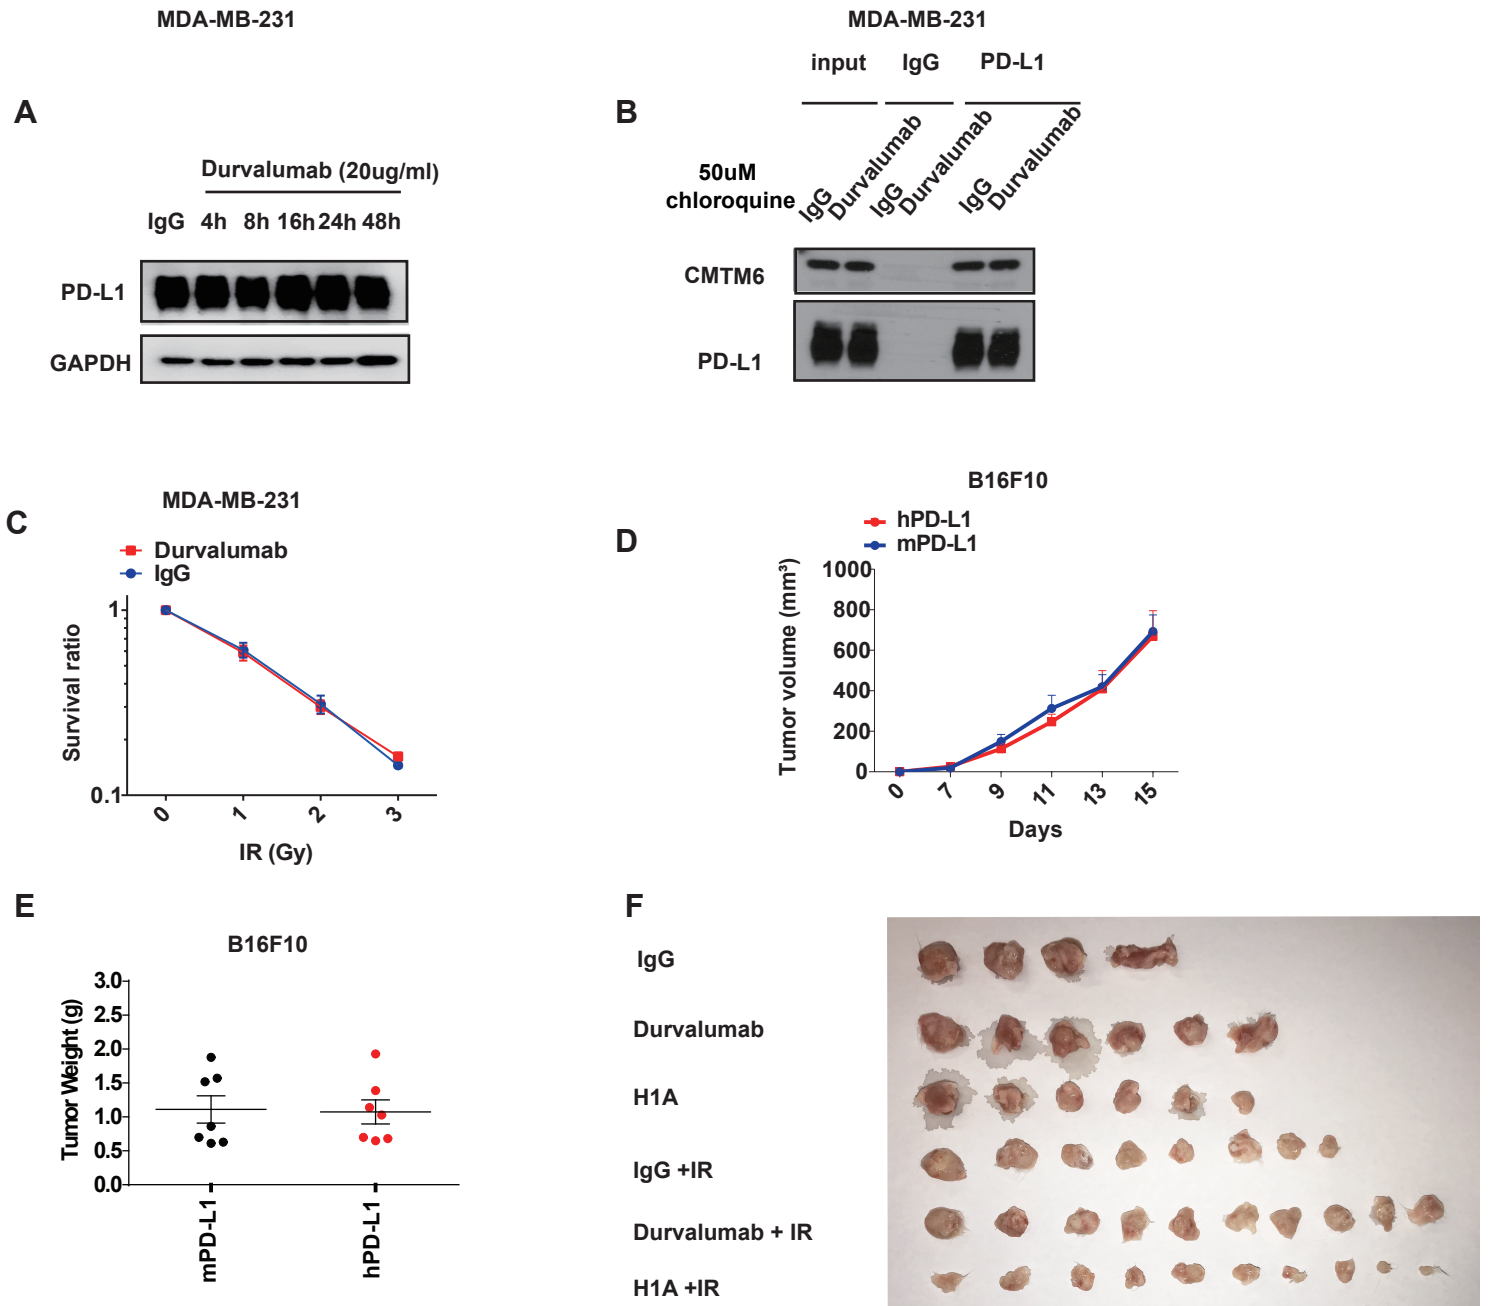

Supplement: NIHMS1043985-supplement-sub-figure.pdf [file NIHMS1043985-supplement-sub-figure.pdf]
